# Supplementary material for: Characterization of an In Vivo Neutralizing Anti-Vaccinia Virus D8 Single-Chain Fragment Variable (scFv) from a Human Anti-Vaccinia Virus-Specific Recombinant Library
Source: MDPI journal article supplement (doi:10.3390/vaccines9111308), 2021-11-10
Supplement: s1 [file s1]

## Legends to supplemental material

**Table S1.** Degenerate primer used for the amplification of variable- and part of the constant region of the heavy IgG-chains and  $\kappa$ - and  $\lambda$ -light chains respectively. The expected product size was 650 bp.

| Primer                 | Sequence 5'→3'                      |
|------------------------|-------------------------------------|
| HuIgG1-4CH1FOR         | GTC CAC CTT GGT GTT GCT GGG CTT     |
| HuVH1aBACK             | CAR RTG CAG CTG GTG CAG TCT GG      |
| HuVH1bBACK             | CAG GTY CAG CTK GTG CAG TCT GG      |
| HuVH1cBACK             | SAG GTC CAG CTG GTA CAG TCT GG      |
| HuVH1d-7BACK           | CAR RTS CAG CTG GTG CAR TCT GG      |
| HuVH2aBACK             | CAG RTC ACC TTG ARG GAG TCT GG      |
| HuVH3aBACK             | SAG GTR CAG CTG GTG GAG TCT GG      |
| HuVH4aBACK             | CAG STG CAG CTG CAG GAG TCS GG      |
| HuVH5aBACK             | GAR GTG CAG CTG GTG CAG TCT GG      |
| HuVH6aBACK             | CAG GTA CAG CTG CAG CAG TCA GG      |
| HuVH7aBACK             | CAG GTS CAG CTG GTG CAA TCW GG      |
| HuC $\kappa$ FOR       | AGA CTC TCC CCT GTT GAA GCT CTT     |
| HuV $\kappa$ 1aBACK    | RAC ATC CAG WTG ACC CAG TCT CC      |
| HuV $\kappa$ 1bBACK    | GMC ATC CAG TTG ACC CAG TCT CC      |
| HuV $\kappa$ 2aBACK    | GAT RTT GTG ATG ACY CAG WCT CC      |
| HuV $\kappa$ 2bBACK    | GAT RTT GTG ATG ACW CAG TCT CC      |
| HuV $\kappa$ 3aBACK    | GAA ATW GTG WTG ACR CAG TCT CC      |
| HuV $\kappa$ 3cBACK    | GAA ATT GTR WTG ACA CAG TCT CC      |
| HuV $\kappa$ 4aBACK    | GAC ATC GTG ATG ACC CAG TCT CC      |
| HuV $\kappa$ 5aBACK    | GAA ACG ACA CTC ACG CAG TCT CC      |
| HuV $\kappa$ 6aBACK    | GAA ATT GTG CTG ACT CAG TCT CC      |
| HuV $\kappa$ 6bBACK    | GAT GTT GTG ATG ACA CAG TCT CC      |
| HuC $\lambda$ 2FOR     | TGA AGA TTC TGT AGG GGC CAC TGT CTT |
| HuC $\lambda$ 7FOR     | AGA GCA TTC TGC AGG GGC CAC TGT CTT |
| HuV $\lambda$ 1aBACK   | CAG TCT GTG CTG ACT CAG CCA CC      |
| HuV $\lambda$ 1bBACK   | CAG TCT GTG YTG ACG CAG CCG CC      |
| HuV $\lambda$ 2BACK    | CAG TCT GCC CTG ACT CAG CCT GC      |
| HuV $\lambda$ 3aBACK   | TCC TAT GWG CTG ACW CAG CCA CC      |
| HuV $\lambda$ 3bBACK   | TCT TCT GAG CTG ACT CAG GAC CC      |
| HuV $\lambda$ 4a-9BACK | CWG CCT GTG CTG ACT CAG CCM CC      |
| HuV $\lambda$ 4bBACK   | CAG CYT GTG CTG ACT CAA TCR         |
| HuV $\lambda$ 5BACK    | CAG SCT GTG CTG ACT CAG CCR         |
| HuV $\lambda$ 6BACK    | AAT TTT ATG CTG ACT CAG CCC CA      |
| HuV $\lambda$ 7-8BACK  | CAG RCT GTG GTG ACY CAG GAG CC      |
| HuV $\lambda$ 10BACK   | CAG GCA GGG CTG ACT CAG CCA CC      |

**Table S2.** Degenerate primer used for the amplification of variable regions with overlapping parts coding for the (G<sub>4</sub>S)<sub>3</sub>-linker. The expected product sizes were 420 bp for the variable region of the heavy chains and 380 bp for the light chains. The BACK-primers used for the PCR of the heavy chain variable region were the same shown in Supplemental Table S1.

| Primer         | Sequence 5'→3'                                                                   |
|----------------|----------------------------------------------------------------------------------|
| Linker-HuJH1-2 | AGA ACC ACC TCC GCC TGA ACC GCC TCC ACC<br>TGA GGA GAC GGT GAC CAG GGT GC        |
| Linker-HuJH3   | AGA ACC ACC TCC GCC TGA ACC GCC TCC ACC<br>TGA AGA GAC GGT GAC CAT TGT CC        |
| Linker-HuJH4-5 | AGA ACC ACC TCC GCC TGA ACC GCC TCC ACC<br>TGA GGA GAC GGT GAC CAG GGT TC-       |
| Linker-HuJH6   | AGA ACC ACC TCC GCC TGA ACC GCC TCC ACC<br>TGA GGA GAC GGT GAC CGT GGT CC        |
| HuJκ1FOR       | ACG TTT GAT TTC CAC CTT GGT CCC                                                  |
| HuJκ2FOR       | ACG TTT GAT CTC CAG CTT GGT CCC                                                  |
| HuJκ3FOR       | ACG TTT GAT ATC CAC TTT GGT CCC                                                  |
| HuJκ4FOR       | ACG TTT GAT CTC CAC CTT GGT CCC                                                  |
| HuJκ5FOR       | ACG TTT AAT CTC CAG TCG TGT CCC                                                  |
| Linker-HuVκ1a  | GTT CAG GCG GAG GTG GTT CTG GCG GTG GCG<br>GAT CGR ACA TCC AGW TGA CCC AGT CTC C |
| Linker-HuVκ1b  | GTT CAG GCG GAG GTG GTT CTG GCG GTG GCG<br>GAT CGG MCA TCC AGT TGA CCC AGT CTC C |
| Linker-HuVκ2a  | GTT CAG GCG GAG GTG GTT CTG GCG GTG GCG<br>GAT CGG ATR TTG TGA TGA CYC AGW CTC C |
| Linker-HuVκ2b  | GTT CAG GCG GAG GTG GTT CTG GCG GTG GCG<br>GAT CGG ATR TTG TGA TGA CWC AGT CTC C |
| Linker-HuVκ3a  | GTT CAG GCG GAG GTG GTT CTG GCG GTG GCG<br>GAT CGG AAA TWG TGW TGA CRC AGT CTC C |
| Linker-HuVκ3c  | GTT CAG GCG GAG GTG GTT CTG GCG GTG GCG<br>GAT CGG AAA TTG TRW TGA CAC AGT CTC C |
| Linker-HuVκ4a  | GTT CAG GCG GAG GTG GTT CTG GCG GTG GCG<br>GAT CGG ACA TCG TGA TGA CCC AGT CTC C |
| Linker-HuVκ5a  | GTT CAG GCG GAG GTG GTT CTG GCG GTG GCG<br>GAT CGG AAA CGA CAC TCA CGC AGT CTC C |
| Linker-HuVκ6a  | GTT CAG GCG GAG GTG GTT CTG GCG GTG GCG<br>GAT CGG AAA TTG TGC TGA CTC AGT CTC C |
| Linker-HuVκ6b  | GTT CAG GCG GAG GTG GTT CTG GCG GTG GCG<br>GAT CGG ATG TTG TGA TGA CAC AGT CTC C |
| Hu Jλ1FOR      | ACC TAG GAC GGT GAC CTT GGT CCC                                                  |

|                 |                                                                                                             |
|-----------------|-------------------------------------------------------------------------------------------------------------|
| Hu Jλ2-3FOR     | ACC TAG GAC GGT CAG CTT GGT CCC                                                                             |
| Hu Jλ4-5FOR     | ACC TAA AAC GGT GAG CTG GGT CCC                                                                             |
| Hu Jλ7FOR       | ACC GAG GAC GGT CAG CTG GGT GCC                                                                             |
| Linker-HuVλ1a   | GTT CAG GCG GAG GTG GTT CTG GCG GTG GCG<br>GAT CGC AGT CTG TGC TGA CTC AGC CAC C                            |
| Linker-HuVλ1b   | GTT CAG GCG GAG GTG GTT CTG GCG GTG GCG<br>GAT CGC AGT CTG TG <sup>Y</sup> TGA CGC AGC CGG C                |
| Linker-HuVλ2    | GTT CAG GCG GAG GTG GTT CTG GCG GTG GCG<br>GAT CGC AGT CTG CCC TGA CTC AGC CTG C                            |
| Linker-HuVλ3a   | GTT CAG GCG GAG GTG GTT CTG GCG GTG GCG<br>GAT CGT CCT ATG <sup>W</sup> G C TGA C <sup>W</sup> C AGC CAC C- |
| Linker-HuVλ3b   | GTT CAG GCG GAG GTG GTT CTG GCG GTG GCG<br>GAT CGT CTT CTG AGC TGA CTC AGG ACC C                            |
| Linker-HuVλ4a-9 | GTT CAG GCG GAG GTG GTT CTG GCG GTG GCG<br>GAT CGC <sup>W</sup> G C CTG TGC TGA CTC AGC C <sup>M</sup> C    |
| Linker-HuVλ4b   | GTT CAG GCG GAG GTG GTT CTG GCG GTG GCG<br>GAT CGC AGC <sup>Y</sup> TG TGC TGA CTC AAT C <sup>R</sup> G C   |
| Linker-HuVλ5    | GTT CAG GCG GAG GTG GTT CTG GCG GTG GCG<br>GAT CGC AG <sup>S</sup> CTG TGC TGA CTC AGC C <sup>R</sup> T C   |
| Linker-HuVλ6    | GTT CAG GCG GAG GTG GTT CTG GCG GTG GCG<br>GAT CGA ATT TTA TGC TGA CTC AGC CCC A                            |
| Linker-HuVλ7-8  | GTT CAG GCG GAG GTG GTT CTG GCG GTG GCG<br>GAT CGC AG <sup>R</sup> CTG TGG TGA C <sup>Y</sup> C TGG AGC C   |
| Linker-HuVλ10   | GTT CAG GCG GAG GTG GTT CTG GCG GTG GCG<br>GAT CGC AGG CAG GGC TGA CTC AGC CAC C                            |

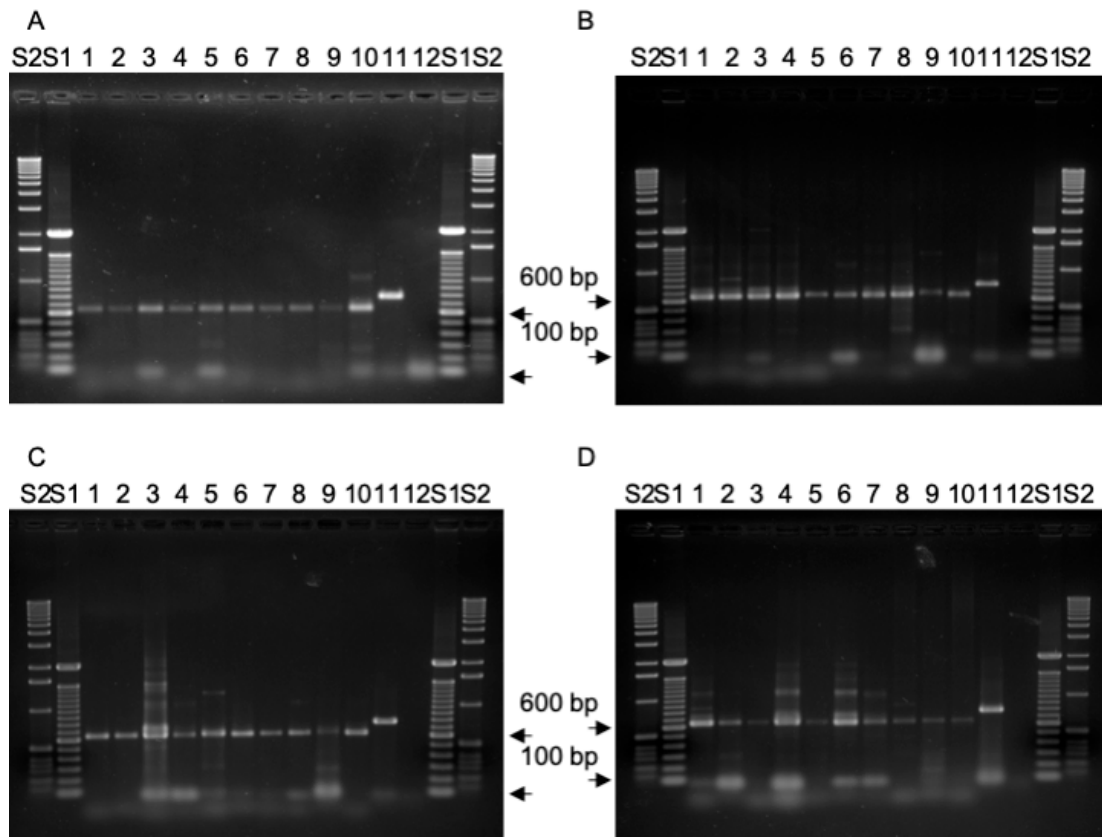

**Figure S1.** Amplification of the 650 bp fragments of the IgG heavy chains from the cDNA synthesized from four different B-lymphocyte donors (**A** to **D**). The fragments consisted of the variable and parts of the constant regions. Primers amplifying GAPDH (11) were chosen to monitor the quality of the cDNA. S1 and S2 were the 1 kb and 100 bp ladders respectively. The products occurred from the combination of HuIgG1-4CH1FOR with HuVH1aBACK (1), HuVH1bBACK (2), HuVH1cBACK (3), HuVH1d-7BACK (4), HuVH2aBACK (5), HuVH3aBACK (6), HuVH4aBACK (7), HuVH5aBACK (8), HuVH6aBACK (9), and HuVH7aBACK (10). The no-template control as negative control is applied in lane 12.

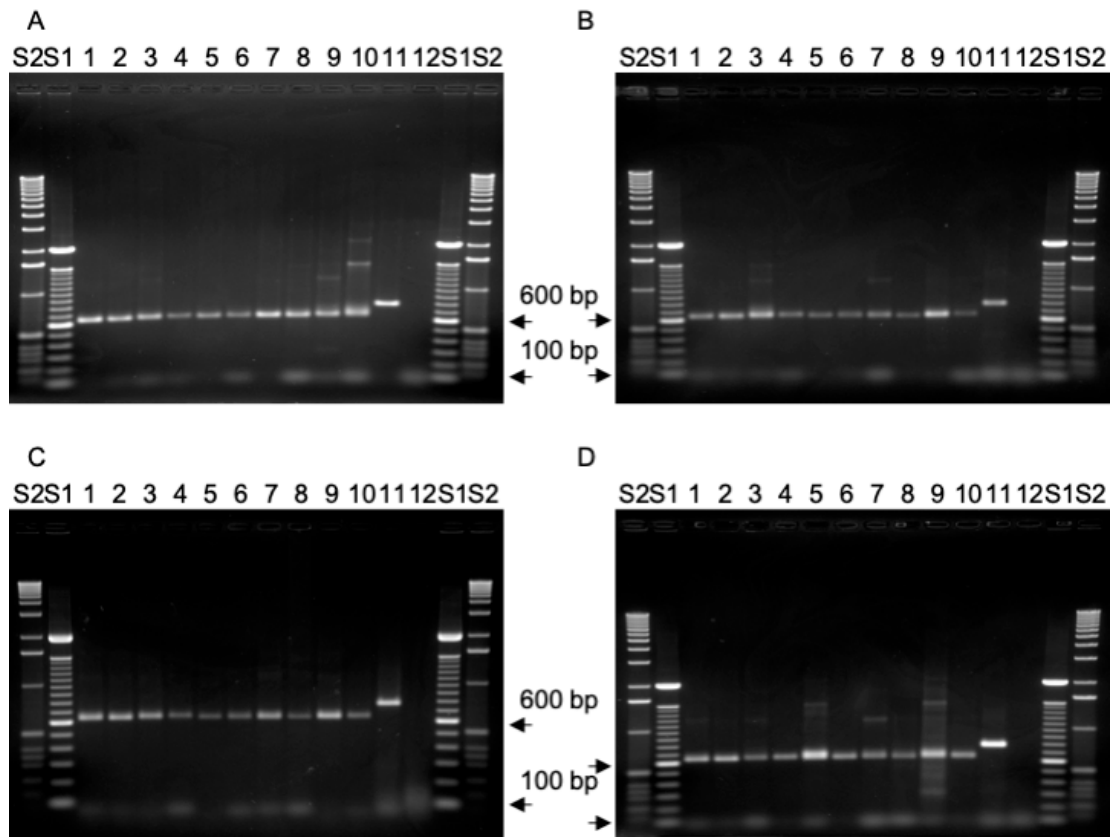

**Figure S2.** Amplification of the 650 bp fragments of the  $\kappa$  light chains from the cDNA synthesized from four different B-lymphocyte donors (**A** to **D**). The fragments consisted of the variable and parts of the constant regions. Primers amplifying GAPDH (11) were chosen to monitor the quality of the cDNA. S1 and S2 were the 1 kb and 100 bp ladders respectively. The products occurred from the combination of HuC $\kappa$ FOR with HuV $\kappa$ 1aBACK (1), HuV $\kappa$ 1bBACK (2), HuV $\kappa$ 2aBACK (3), HuV $\kappa$ 2bBACK (4), HuV $\kappa$ 3aBACK (5), HuV $\kappa$ 3cBACK (6), HuV $\kappa$ 4aBACK (7), HuV $\kappa$ 5aBACK (8), HuV $\kappa$ 6aBACK (9), and HuV $\kappa$ 6aBACK (10). The no-template control as negative control is applied in lane 12.

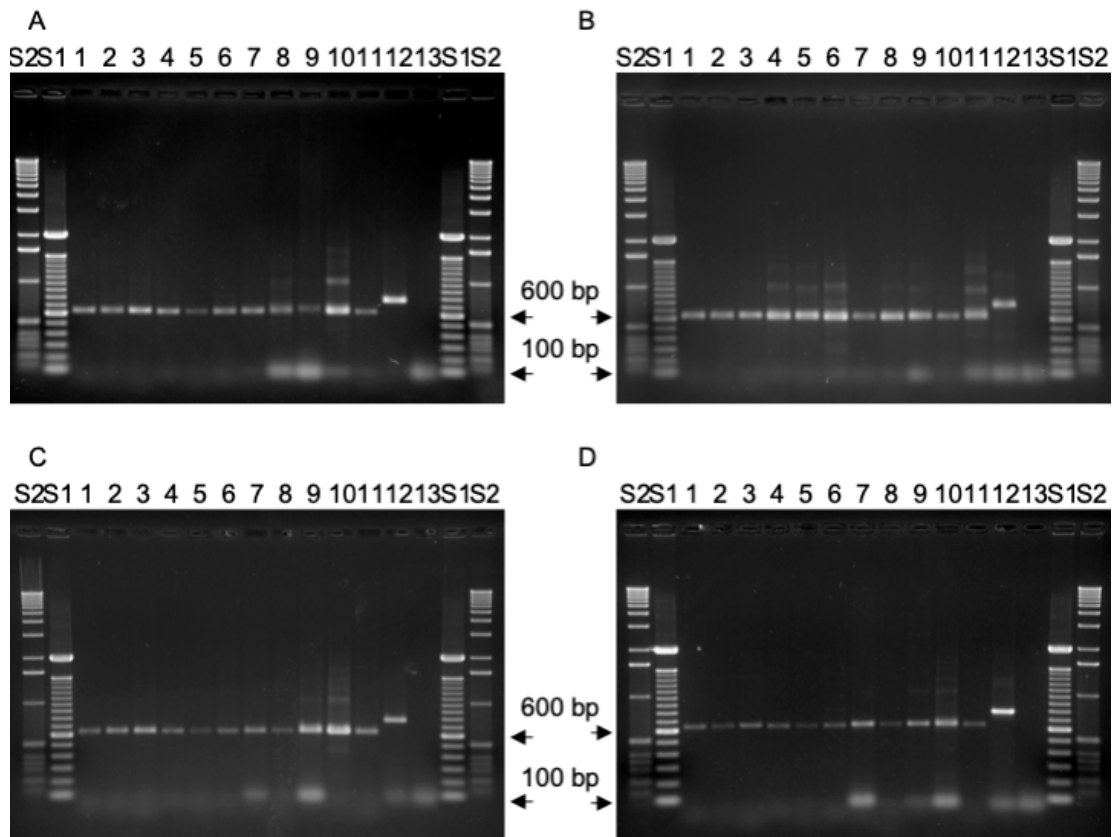

**Figure S3.** Amplification of the 650 bp fragments of the  $\lambda$  light chains from the cDNA synthesized from four different B-lymphocyte donors (**A** to **D**). The fragments consisted of the variable and parts of the constant regions. Primers amplifying GAPDH (12) were chosen to monitor the quality of the cDNA. S1 and S2 were the 1 kb and 100 bp ladders respectively. The products occurred from the combination of HuC $\lambda$ 2FOR and HuC $\lambda$ 7FOR in equal amounts with HuV $\lambda$ 1aBACK (1), HuV $\lambda$ 1bBACK (2), HuV $\lambda$ 2BACK (3), HuV $\lambda$ 3aBACK (4), HuV $\lambda$ 3bBACK (5), HuV $\lambda$ 4a-9BACK (6), HuV $\lambda$ 4bBACK (7), HuV $\lambda$ 5BACK (8), HuV $\lambda$ 6BACK (9), HuV $\lambda$ 7-8BACK (10), and HuV $\lambda$ 10BACK (11). The no-template control as negative control is applied in lane 13.

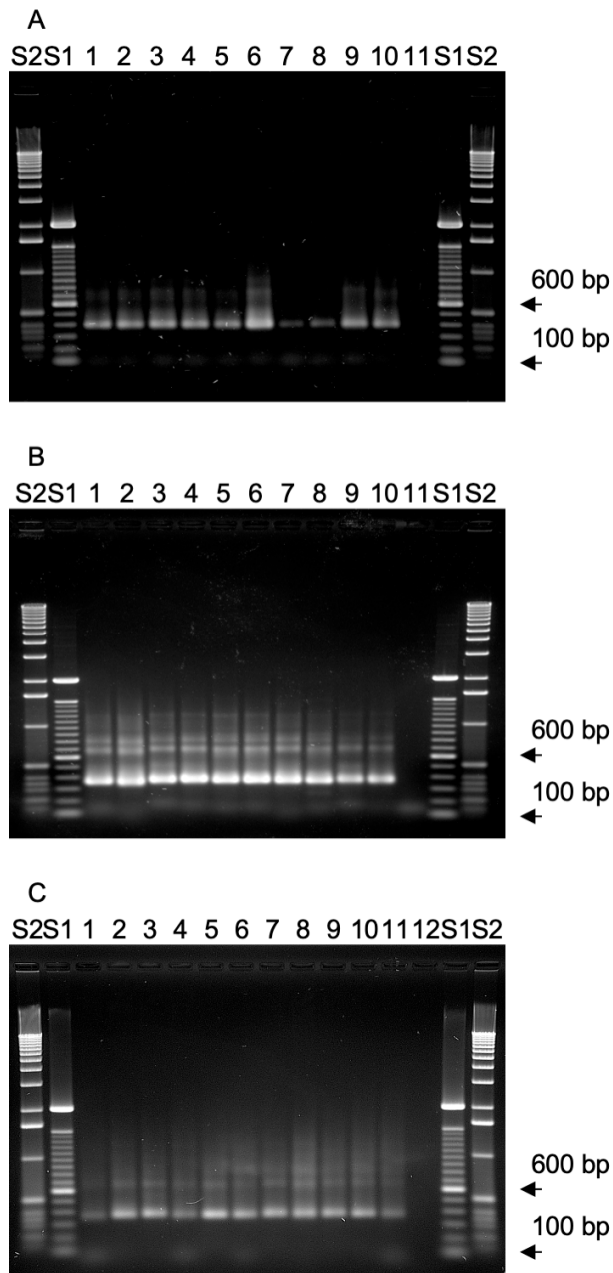

**Figure S4.** Amplification of the variable regions of the heavy chains (**A**),  $\kappa$  light chains (**B**), and  $\lambda$  light chains (**C**) from pooled 650 bp samples (1–10, and 11 for the  $\lambda$  variable regions). The fragments consisted of the variable region and overlapping parts coding for the  $(G_4S)_3$ -linker. S1 and S2 were the 1 kb and 100 bp ladders respectively. The no-template control as negative control is applied in lane 11, and 12 for the  $\lambda$  variable regions respectively. The products were gel-purified and taken as template for splicing by overlap extension-PCR.

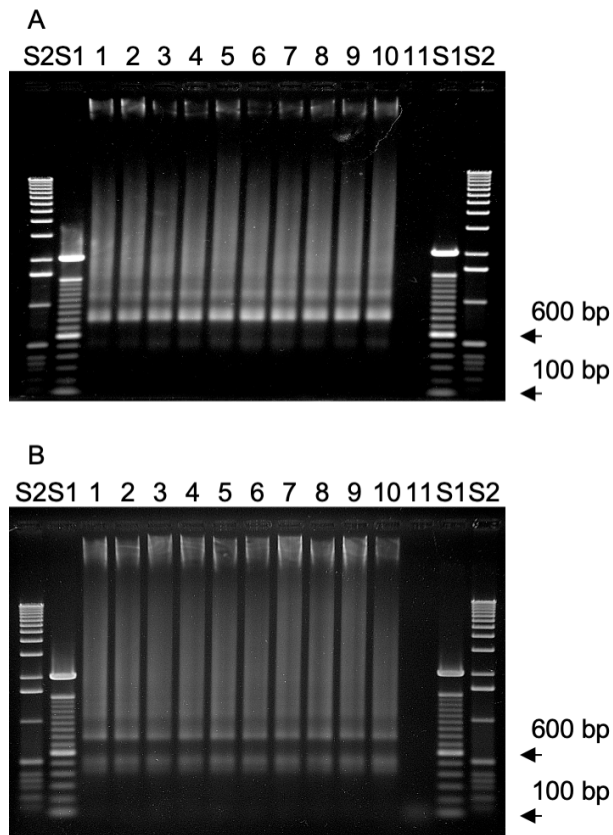

**Figure S5.** Amplification of full scFv including restriction sites for *Sfi*I and *Not*I. The pooled variable regions of the heavy chains were either connected with the variable regions of  $\kappa$  light chains (**A**), or  $\lambda$  light chains (**B**). After SOE-PCR (splicing by overlap extension) the products were divided into 10 templates (1–10) for the re-amplification and connection of restriction sites. S1 and S2 were the 1 kb and 100 bp ladders respectively. The no-template control as negative control is applied in lane 11. The products were gel-purified and restricted before ligation into pCANTAB5E.

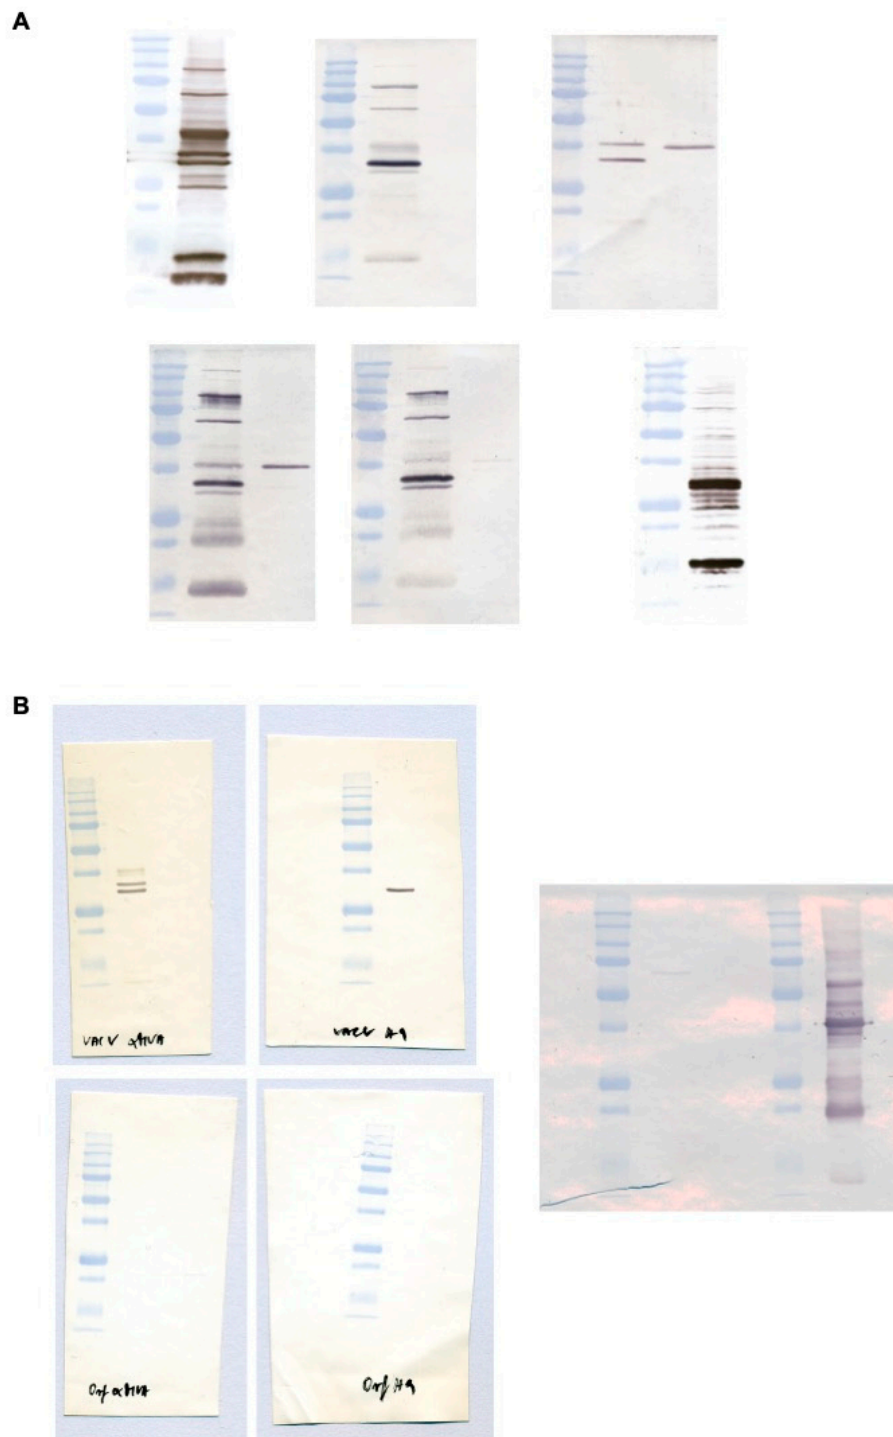

**Figure S6.** (A) Original Western blots as presented in Figure 2 and (B) Original Western blots as presented in Figure 6 in the main manuscript. After development blot strips were dried, cut to form, and scanned.
